# Supplementary material
Source: PubMed Central journal article supplement (PMC6864283)
Supplement: NIHMS1540718-supplement-1.pdf [file NIHMS1540718-supplement-1.pdf]

**Supplemental Table 1.** Patient characteristics (n=27)

| <b>Characteristic</b>        | <b>Measure/Category</b>              | <b>Overall</b> |
|------------------------------|--------------------------------------|----------------|
| <b>Age, years</b>            | Median (range)                       | 60 (43-71)     |
| <b>WBC ×10<sup>9</sup>/L</b> | Median (range)                       | 20.7 (5.7-67)  |
| <b>ALC ×10<sup>9</sup>/L</b> | Median (range)                       | 14.6 (2-58)    |
| <b>Rai stage</b>             | (0,1-2/3-4) (%)                      | (88/12)        |
| <b>CD38</b>                  | ≤30/>30 (%)                          | 82/18 (%)      |
| <b>Zap-70</b>                | Negative/Positive                    | 82/18 (%)      |
| <b>β2M (mg/L)</b>            | (</≥ 4 mg/L)                         | 100/0 (%)      |
| <b>IGHV mutation</b>         | (M/UM)                               | 68/32 (%)      |
| <b>FISH result, n</b>        | del17p/11q/T12/13q/Negative          | 1/0/1/9/6      |
| <b>Karyotype, n</b>          | Diploid/Non-diploid/Complex/not done | 15/1/0/1       |
| <b>Survival status, (n)</b>  | Alive/Dead                           | 17/0           |

---

WBC, white blood cell count; ALC, absolute lymphocyte count; β2M, beta-2 microglobulin;

M, mutated; UM, unmutated; FISH, fluorescence *in situ* hybridization
